# Supplementary material
Source: PubMed Central journal article supplement (PMC7862922)

**A**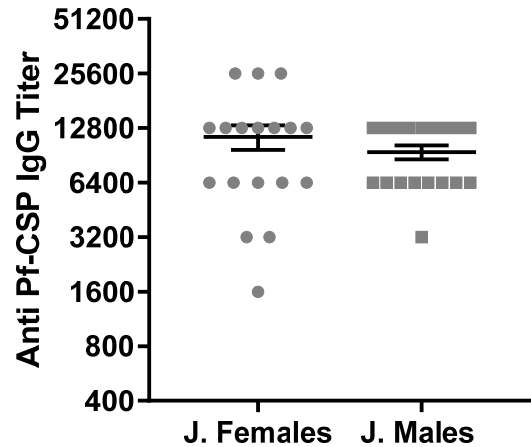**B**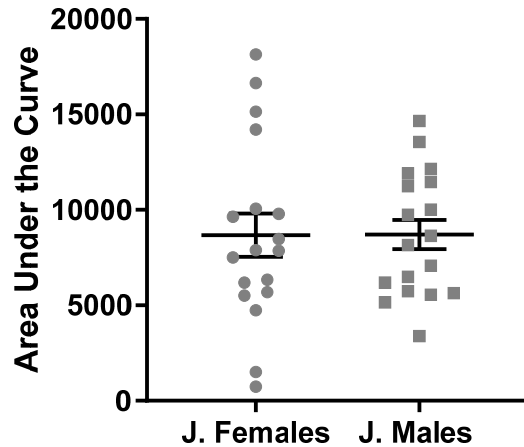**C**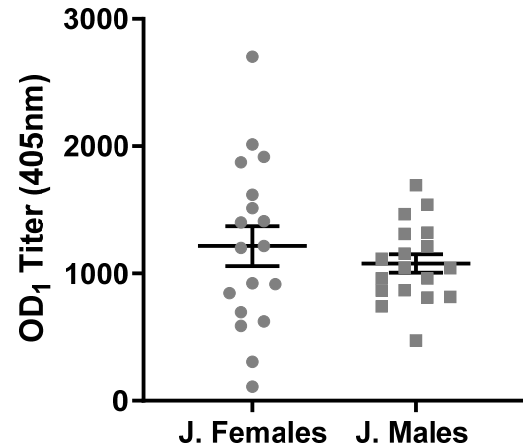

Supplement: NIHMS1666458-supplement-Suppl_Figure_1.pdf [file NIHMS1666458-supplement-Suppl_Figure_1.pdf]
